# Supplementary material for: Ultrasensitive and label-free detection of prognostic and diagnostic biomarkers of sepsis on a AgNP-laden black phosphorous-based SERS platform
Source: Royal Society of Chemistry journal article supplement (doi:10.1039/d1sd00057h), 2022-01-01
Supplement: d1sd00057h1.pdf [file d1sd00057h1.pdf]

## **Supporting Information**

# **Ultrasensitive and Label-free Detection of Prognostic and Diagnostic Biomarker of Sepsis on AgNPs-laden Black Phosphorous based SERS Platform**

*Anirban Kundu, Renu Rani, Anas Ahmad, Ajay Kumar, Mamta Raturi, Tanya Gupta, Rehan Khan\* and Kiran Shankar Hazra\**

Institute of Nano Science and Technology, Knowledge City, Sector 81, Mohali,  
Punjab, 140306, India

E-mail: [kiran@inst.ac.in](mailto:kiran@inst.ac.in); [rehankhan@inst.ac.in](mailto:rehankhan@inst.ac.in)

**Keywords:** Sepsis; Surface enhanced Raman spectroscopy (SERS); Biomarker detection;  
Layered black phosphorus (BP), spiked clinical sample.

# 1. Synthesis of AgNP@BP flake:

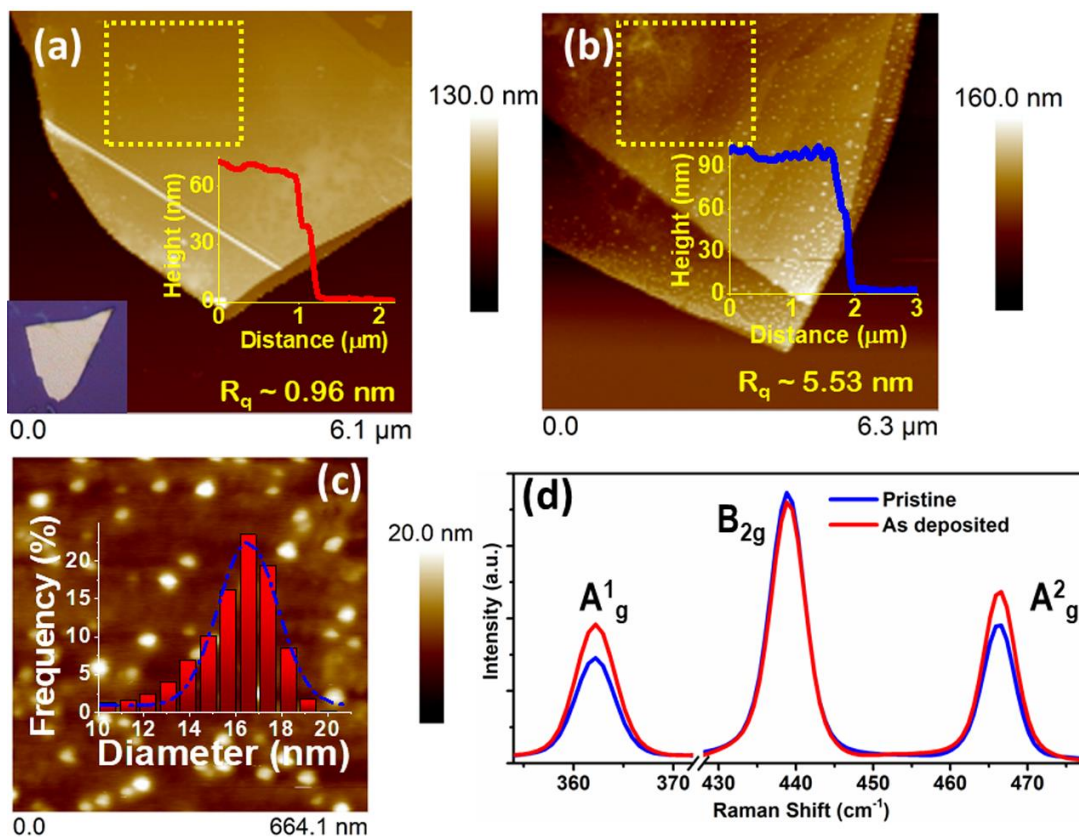

**Figure S1| One-step synthesis of AgNPs decorated BP flake (AgNP@BP).** (a) AFM height image of pristine BP flake with  $R_q \sim 0.96$  nm, inset shows the optical image of the same flake; (b) AFM image of the AgNPs deposited BP flake with increased  $R_q \sim 5.53$  nm; (c) The enlarged height image of AgNP@BP flake and the overlay plot shows the Gaussian particle size distribution having mean diameter of  $\sim 15.62 \pm 0.07$  nm; and (d) Raman spectra of the pristine BP flake and AgNP@BP flake.

AFM topography image of pristine and AgNP@BP flakes are shown in Figure S1a-b, which suggests that the thickness of AgNP@BP flake ( $\sim 91$  nm) is increased by  $\sim 14$  nm as compared to the pristine one ( $\sim 77$  nm). The height profile of the flakes has been shown in the overlay of Figure S1a-b, where the slight increase in thickness is observed due to deposition of AgNPs on the surface, defining the deposition process as a surface phenomenon and not due to the intercalation of the nanoparticles in between the BP nano-sheets/layers. Surface roughness of flakes, measured from the marked dotted area in Figure S1a-b, depict a six-fold enhancement in RMS (root mean square)

surface roughness ( $R_q$ ) value of the AgNP@BP flake ( $R_q \sim 5.53$  nm) as compared to the pristine one ( $R_q \sim 0.96$  nm). The increase in surface roughness confirms the deposition of AgNPs exclusively on the surface of the BP flake, which forms the basis of AgNP@BP based SERS substrate. Enlarged topography image (Figure S1c) of the marked area shows that the as-grown AgNPs onto the surface of BP flake are distinct and uniformly distributed without any signature of agglomeration. The particle size distribution, shown in the histogram in the inset of Figure S1c, depicts that the deposited AgNPs have an average particle diameter of  $16.52 \pm 0.07$  nm in a perfectly Gaussian distribution. The size and crystallinity of the nanoparticles has further been verified using transmission electron microscopy (TEM) imaging technique, as depicted in Figure S2-S4, where the optimization of the  $\text{AgNO}_3$  concentration has also been described (Figure S4). Raman spectra of the pristine BP and AgNP@BP flakes are shown in Figure 1d, which shows three characteristics Raman modes  $A_g^1$ ,  $B_{2g}$ , and  $A_g^2$ , corresponding to out-of-plane vibration, in-plane vibration along zigzag and armchair direction, respectively. No significant shift in Raman peak position is observed for the characteristics Raman modes after adsorption of AgNPs on pristine BP flake, which confirms that the pristine structure of the BP flake remains unaltered and suggest that AgNPs are only adsorbed on the surface of the BP flake.

## 2. TEM characterization of AgNP@BP flake:

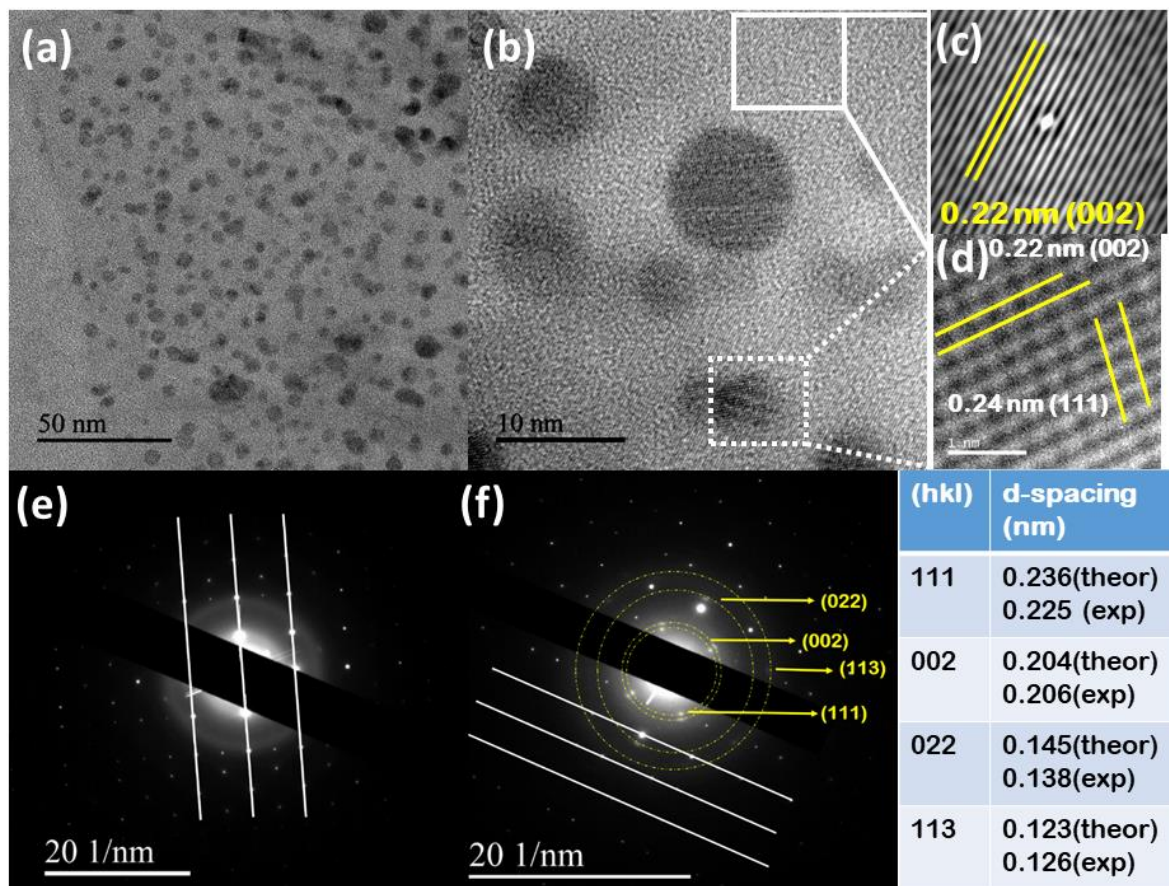

**Figure S2| TEM analysis of the AgNP@BP flake.** (a) TEM micrograph of as-deposited AgNP@BP flake with uniform distribution of the AgNPs over the surface of the BP flake; (b) HRTEM micrograph of the AgNP@BP flake showing the crystal planes of pristine BP and AgNP@BP flake; (c-d) Auto correlated FFT image of HRTEM micrograph of pristine BP flake and AgNPs@BP flake, respectively; (e-f) SAED pattern of pristine and AgNP@BP flake. The table shows the (hkl) planes AgNPs and their corresponding experimental and theoretical d-spacing value.

In order to investigate the size of the AgNPs and the crystalline nature of the flake, TEM analysis has been carried out for the pristine BP flake and AgNP@BP flake, as shown in Figure S2. The TEM micrograph of AgNP@BP flake (Figure S2a) confirms that the AgNPs are solely synthesized on the BP flake only, and no trace of AgNPs were found apart from the flake surface, which confirms that the BP flake assists the formation of AgNPs over its surface. The uniformly

distributed AgNPs, having average particle size distribution is found to be  $\sim 7.24 \pm 0.18$  nm, validate our previous analysis through AFM surface topography (Figure S2b). The inter particle distance has also been calculated, where the average distance has been found to be  $\sim 1.4$  nm. Such small inter particle distance suggests that the AgNPs are well arranged and can have potential applications in terms of enhancement in localized electric field. The crystallinity of the AgNP@BP flake with area focused on BP (without AgNPs), and the area containing AgNPs are distinguished from the HRTEM images recorded by 200 KV electron microscope (Figure S2b). The d-spacing of the crystal planes corresponding to BP and AgNP are simulated from HRTEM micrographs using auto-correlated lattice fringe images. The comparison of the lattice fringes originated from the pristine area (solid box) and the AgNP deposited area (dotted box), are shown in Figure S2c and Figure S2d, respectively. The pristine area shows uniform lattice fringe of  $\sim 0.22$  nm (Figure S2c) originating due to BP crystal corresponding to the (002) plane; whereas at the AgNP deposited area, the lattice fringes for both BP [of  $\sim 0.22$  nm corresponds to (002) plane] and AgNPs [of 0.24 nm corresponds to (111) plane] are observed (Figure S2d). The selected area electron diffraction (SAED) pattern of pristine BP flake (Figure S2e) confirms its orthorhombic crystal structure, where bright spots corresponding to different planes, as marked in Figure S2f, are arranged in parallel lines (marked by white lines). The SAED pattern of the AgNP area (Figure S2f) confirms the highly crystalline nature of AgNPs, where the crystallinity of pristine BP flake remains unchanged. The characteristics crystal planes of the AgNPs, i.e., (111), (002), (022), and (113), are identified and indexed (with dotted circle in Figure S2f) in the SAED pattern of AgNP deposited area. The d-spacing (theoretical and measured) corresponding to that (hkl) crystal planes are tabulated in Table (Figure S2), where measured values match well with the theoretical value. The SAED pattern of AgNPs deposited area (Figure S2f), having diffraction patterns both from

BP flake and AgNP, confirms the strong adhesion of AgNPs on the BP surface. Qualitative elemental analysis has also been carried out from the EDX techniques, as shown in Figure S3, which confirms that no other elements apart from phosphorus and silver are present in the AgNP deposited BP (AgNP@BP) flake.

### 3. EDAX analysis of AgNP@BP flake:

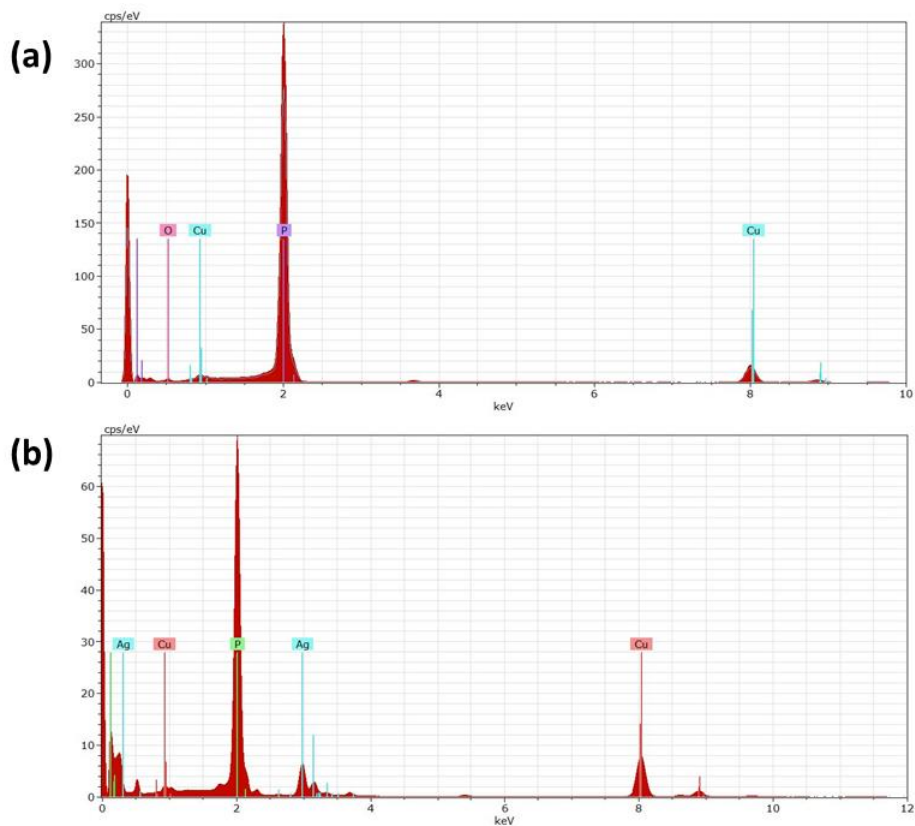

**Figure S3|** EDX spectra of (a) pristine BP flake and (b) AgNP@BP flake shows the presence of phosphorous in pristine BP and presence of both phosphorous as well as silver in AgNP@BP flake. The same flake has been used for EDX spectra analysis before and after the disposition of AgNPs. EDX spectra further shows that no oxidation of BP flake is occurred during AgNPs deposition.

#### 4. Optimization of AgNO<sub>3</sub> concentration:

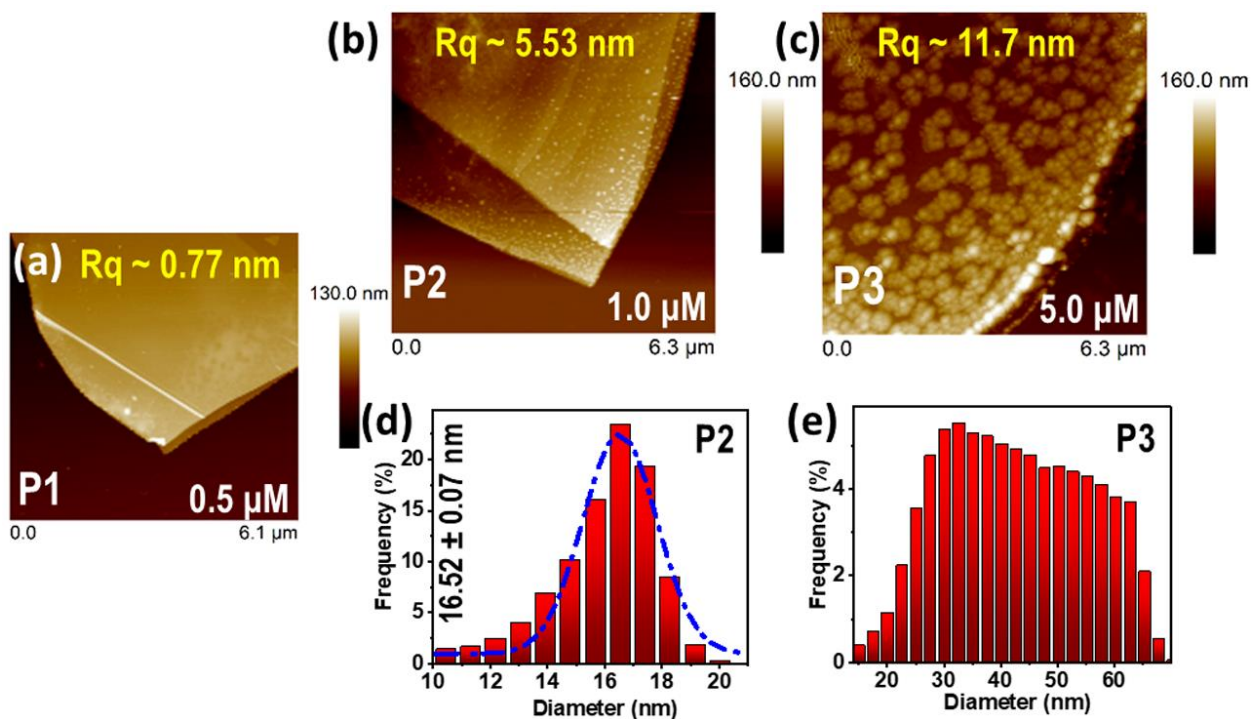

**Figure S4| AFM height images and measured surface roughness of as deposited AgNP@BP flake,** with the variation in concentration of AgNO<sub>3</sub> precursor solution of (a) 0.5  $\mu$ M, (b) 1.0  $\mu$ M and (c) 5.0  $\mu$ M. The particle size distribution for the as deposited AgNP@BP flake correspond to the AgNO<sub>3</sub> concentration of (d) 1.0  $\mu$ M and (e) 5.0  $\mu$ M.

In order to control the particle size of the deposited AgNPs, the concentration of the precursor (AgNO<sub>3</sub>) solution has been varied (P1: 0.5 $\mu$ M, P2: 1 $\mu$ M, and P3: 5 $\mu$ M) and simultaneously AFM height images of AgNP@BP flakes are recorded (Figure S4a-c). Though AgNPs are observed for P2 and P3 samples but no signature of nanoparticle deposition is found for sample P1. The particle size distribution (Figure S4d-e) is found to be quite uniform for the P2 sample. In contrast, agglomerated AgNPs are observed for the P3 sample (Figure S4c) and also exhibited non-uniform particle size distribution (Figure S4e). The surface roughness for all three samples is shown in Figure S4a-c, where it is evident that AgNPs deposition is uniform for sample P2, showing Gaussian distribution of particle size with mean value  $\sim 16.52 \pm 0.07$  nm, which are in good

agreement with the calculated average particle size distribution from TEM micrographs (Figure S2a). For sample P1, the surface roughness ( $R_q$ ) is  $\sim 0.77 \pm 0.002$  nm, which is originating from the intrinsic roughness of the flake and similar to the RMS value of pristine BP flake ( $R_q \sim 0.96$  nm), and hence no AgNP deposition is noticed. However, for sample P3, the surface roughness is  $\sim 11.7$  nm, showing agglomeration of AgNPs with non-uniform particle size distribution, varying from 10 nm to 70 nm, confirming that further increase in the concentration of  $\text{AgNO}_3$  in precursor solution leads to the agglomeration.

### 5. Stability of AgNPs deposited BP flake (AgNP@BP):

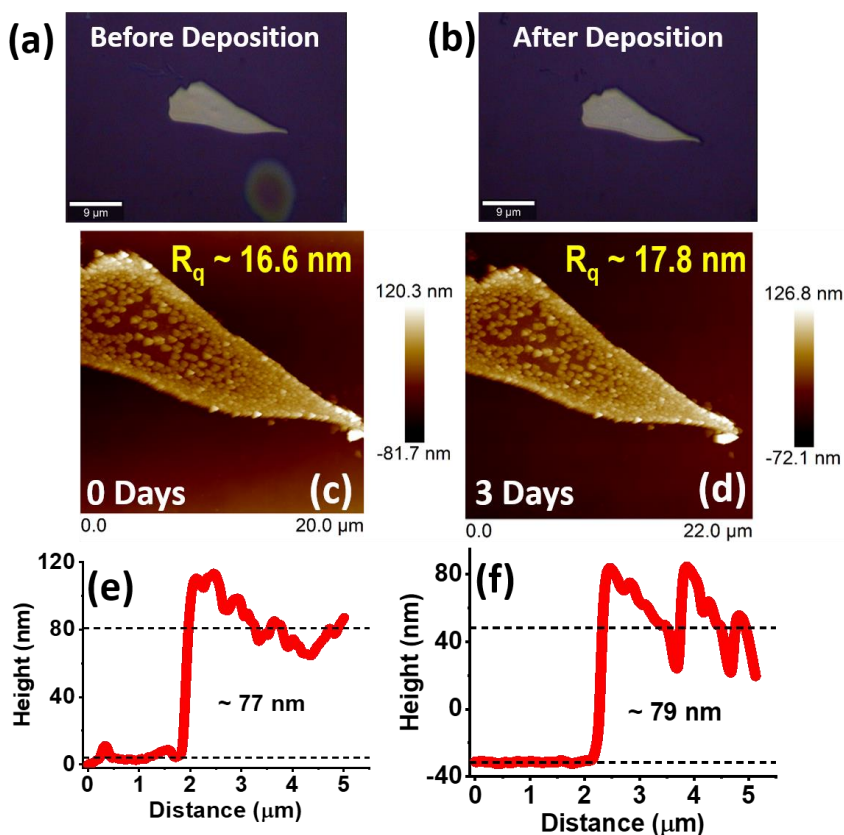

**Figure S5|** Optical image of BP flake (a) before and (b) after deposition of AgNPs. AFM height image and measured surface roughness ( $R_q$ ) of the AgNP@BP flake after deposition at (c) 0 hrs and (d) 72 hrs or 3 days. Height profile at (d) 0 hrs and (e) 72 hrs confirms that no degradation in BP flake is observed.

## 6. Raman spectra of LPS with different concentration of AgNO<sub>3</sub>:

Raman spectroscopy measurement has also been tried on different SERS substrate, where the concentration of AgNO<sub>3</sub> precursor has been varied. We have tried the SERS measurement on the substrate P1 and P3 with lipopolysaccharide (LPS) and corresponding Raman spectra are shown in Figure S6. Although the enhancement in Raman signal is observed for both P1 and P3, but the Raman modes are not distinguishable as compare to the Raman signal observed for P2. Thus, it can be concluded that the uniform distribution of AgNPs is an essential factor for appropriate Raman signal. For substrate P3, the agglomeration of AgNPs is the key reason for ineffective Raman spectra. Hence, all the Raman enhancement experiments for IL-3 and PCT are performed on a similar substrate as P2, where the initial concentration of aqueous AgNO<sub>3</sub> is 1  $\mu$ M.

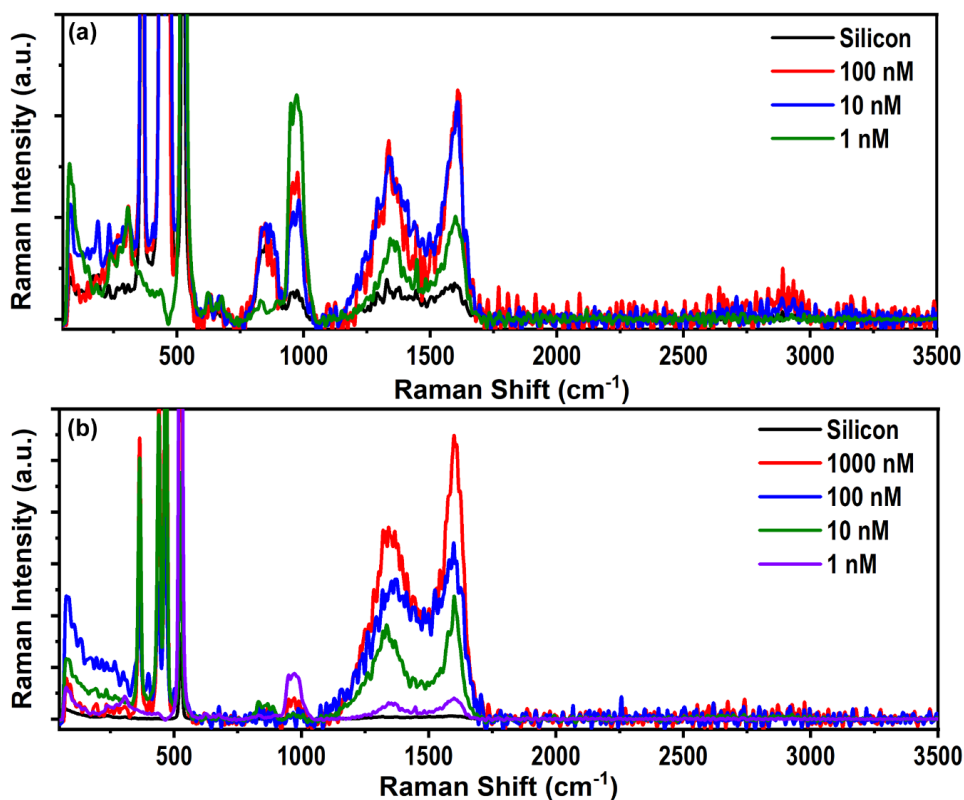

**Figure S6** Raman spectra of LPS with varying concentration upto 1 nM on different AgNP@BP substrate where precursor AgNO<sub>3</sub> concentration are (a) 0.5  $\mu$ M and (b) 5.0  $\mu$ M.

## **7. Identification of hotspot area at AgNP@BP flake:**

In order to calculate the number of particles present in a particular area, we have chosen seven (7) different areas ranging from  $\sim 0.44 \mu\text{m}^2$  to  $\sim 4.0 \mu\text{m}^2$  and identified the particles from the AFM analysis to calculate the number of silver nanoparticles (AgNPs). The AFM height and phase images of the seven different regions are shown in Figure S7, where each area has been named as A, B, C, D, E, F and G. To calculate the number of AgNPs, we have used the phase images as the contrasts in nanoparticles are clearly visible in the phase images as compared to the height images. The table ST1 shows the calculated area of different region, number of particles in that area and per unit area. From the table we have calculated the average number of particles per unit area, which has further been used to calculate the SERS enhancement factor (EF).

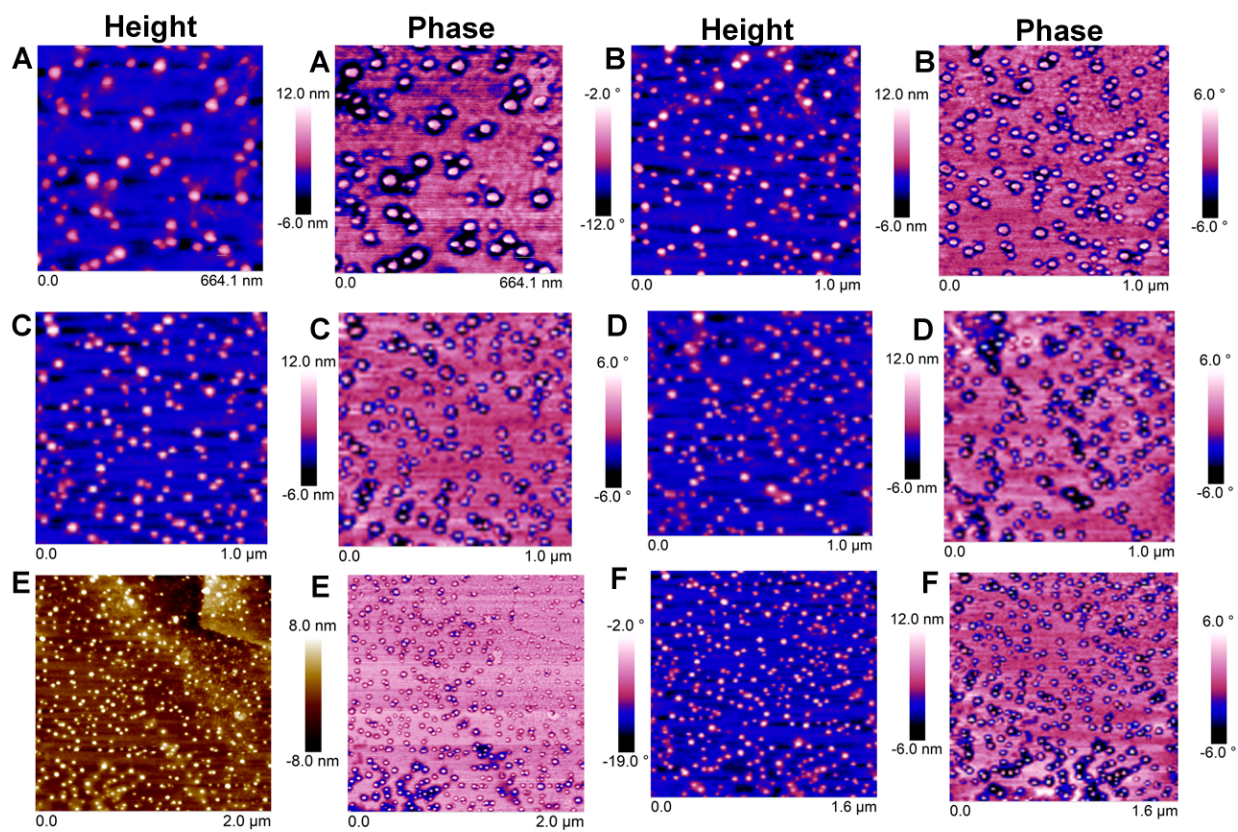

**Figure S7|** The AFM height and phase image of six different regions (A-F), where the phase images give better contrast of the AgNPs present on the SERS substrate.

**Table ST1:** Tables shows the dimension, area (A), number of particles (N) and corresponding average number of particles per unit area (n).

|                                                                 | A           | B    | C    | D    | E    | F    |
|-----------------------------------------------------------------|-------------|------|------|------|------|------|
| <b>Horizontal Dimension (μm)</b>                                | 0.66        | 1.0  | 1.0  | 1.0  | 2.0  | 1.6  |
| <b>Vertical Dimension (μm)</b>                                  | 0.66        | 1.0  | 1.0  | 1.0  | 2.0  | 1.6  |
| <b>Area (A) (μm<sup>2</sup>)</b>                                | ~ 0.44      | 1.0  | 1.0  | 1.0  | 4.0  | 2.56 |
| <b>No. of Particles (N)</b>                                     | 65          | 175  | 122  | 145  | 451  | 302  |
| <b>No. of Particles/μm<sup>2</sup> (n)</b>                      | ~149        | ~175 | ~122 | ~145 | ~113 | ~118 |
| <b>Average No. of Particles/μm<sup>2</sup> (N<sub>av</sub>)</b> | <b>~141</b> |      |      |      |      |      |

## 8. Identification of hotspot area under laser illumination:

The SERS enhancement factor depends on the number of AgNPs present on the surface under the laser illumination, as the target molecules attached to the AgNPs, only contribute to the SERS signal.<sup>1</sup> Thus, the total area contributing to the SERS signal will be  $A_{SERS} = N_{Av} \times \pi d_n^2/4 \times A_{Normal}$ , where  $N_{Av}$  is the average number of AgNPs per unit area,  $d_n$  is the mean diameter of the AgNPs and  $A_{Normal}$  is the laser illuminated area. The laser illuminated area ( $A_{Normal}$ ) has been calculated from the diameter of the laser beam, which is measured by analyzing the Gaussian beam profile of the laser beam by acquiring the optical image of the laser spots. Such measurement shows that the diameter of the laser beam is  $\sim 0.995 \mu\text{m}$ , which is considered as  $d \sim 1 \mu\text{m}$  for further calculations of  $A_{Normal} = \pi d^2/4 = \pi (1)^2/4 \mu\text{m}^2 = 0.785 \mu\text{m}^2$ . Whereas, the  $A_{SERS}$  has been calculated from the covered area of the AgNPs under the laser illuminated area as  $A_{SERS} = N_{Av} \times \pi d_n^2/4 \times$

$A_{Normal}$ , which lead to  $A_{SERS} = 141 \times \pi d_n^2/4 \times 0.785 \mu\text{m}^2 = 141 \times \pi (0.01652)^2/4 \times 0.785 \mu\text{m}^2 = 0.00755 \mu\text{m}^2$ . Such value suggests that the  $A_{SERS}$  is 2-order smaller as compare to the  $A_{Normal}$ .

## 9. Calculation of laser beam diameter

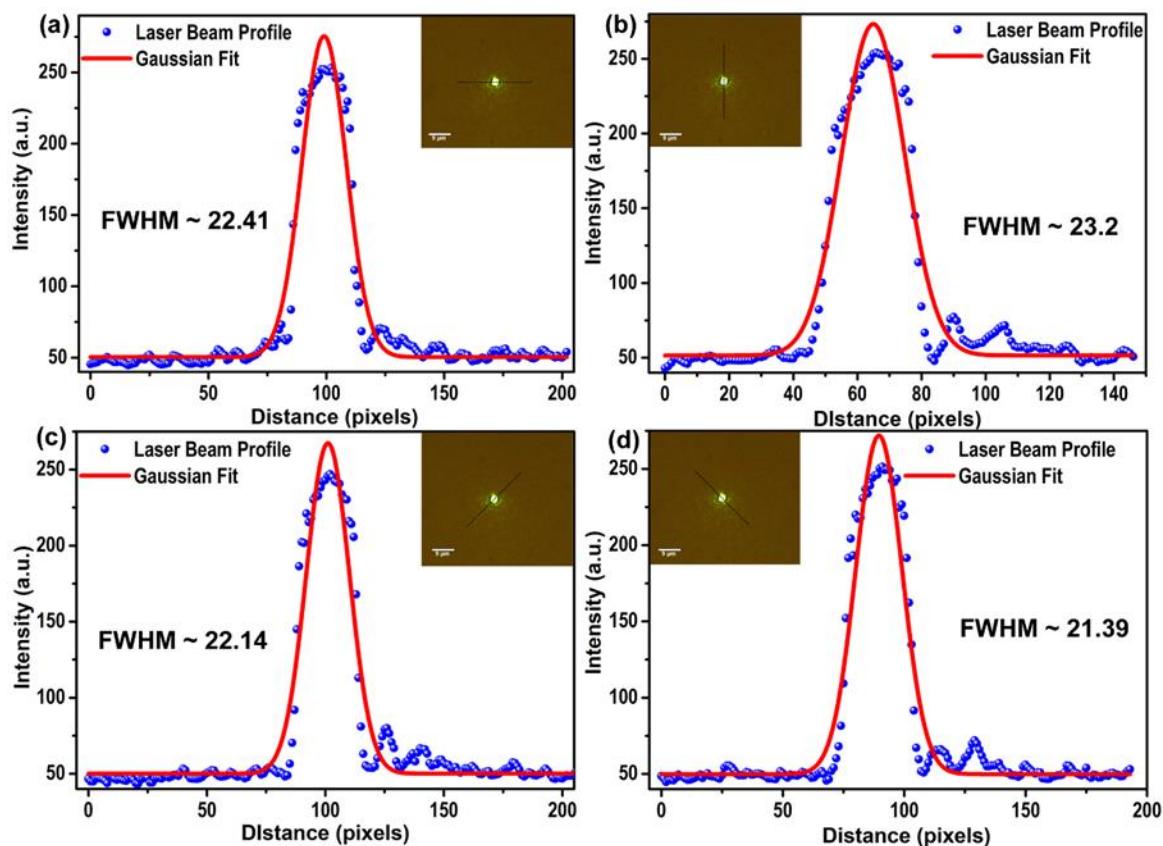

**Figure S8|** Laser beam intensity profile to calculate the beam diameter. Inset shows the reflected optical image of the beam intensity focused using 100X objective. The beam profile has been extracted along directions shown by black lines in the optical images. Average FWHM ~ 22.12 pixels, which corresponds to ~ 0.995  $\mu\text{m}$ . The figure is reproduced from Ref. 11 with permission from the Royal Society of Chemistry.

## **10.Details of calculation of SERS enhancement factor (EF):**

To estimate the SERS enhancement factor (EF) of the probe molecule in the hotspot region, the following equation has been employed  $EF = (I_{SERS} \times N_{Normal}) / (I_{Normal} \times N_{SERS})$ , where  $I_{SERS}$  and  $I_{Normal}$  are the intensities of the same Raman mode for the SERS and normal Raman spectra,  $N_{Normal}$  is the number of molecules probes for a normal Raman scattering and  $N_{SERS}$  is the number of molecules probed in SERS.<sup>1,2</sup> The areas of the Raman bands are used as the intensities of  $I_{SERS}$  and  $I_{Normal}$ . The number of probe molecules in normal Raman scattering can be estimated from the laser illuminated area ( $A_{Normal}$ ), where the area can be calculated from the laser spot size. Here, all the molecules present in that area contribute to the intensities of the normal Raman signal ( $I_{Normal}$ ), whereas the molecules only present in the hotspot area contribute to the SERS Raman signal ( $I_{SERS}$ ). This fact leads to the modification of the equation and the simplified equation becomes  $EF = (I_{SERS} \times A_{Normal}) / (I_{Normal} \times A_{SERS})$ , where  $A_{Normal}$  is the laser illuminated area and  $A_{SERS}$  is the total area of hotspots under the laser illuminated area.

## 11. Single Raman spectra of IL-3 and PCT

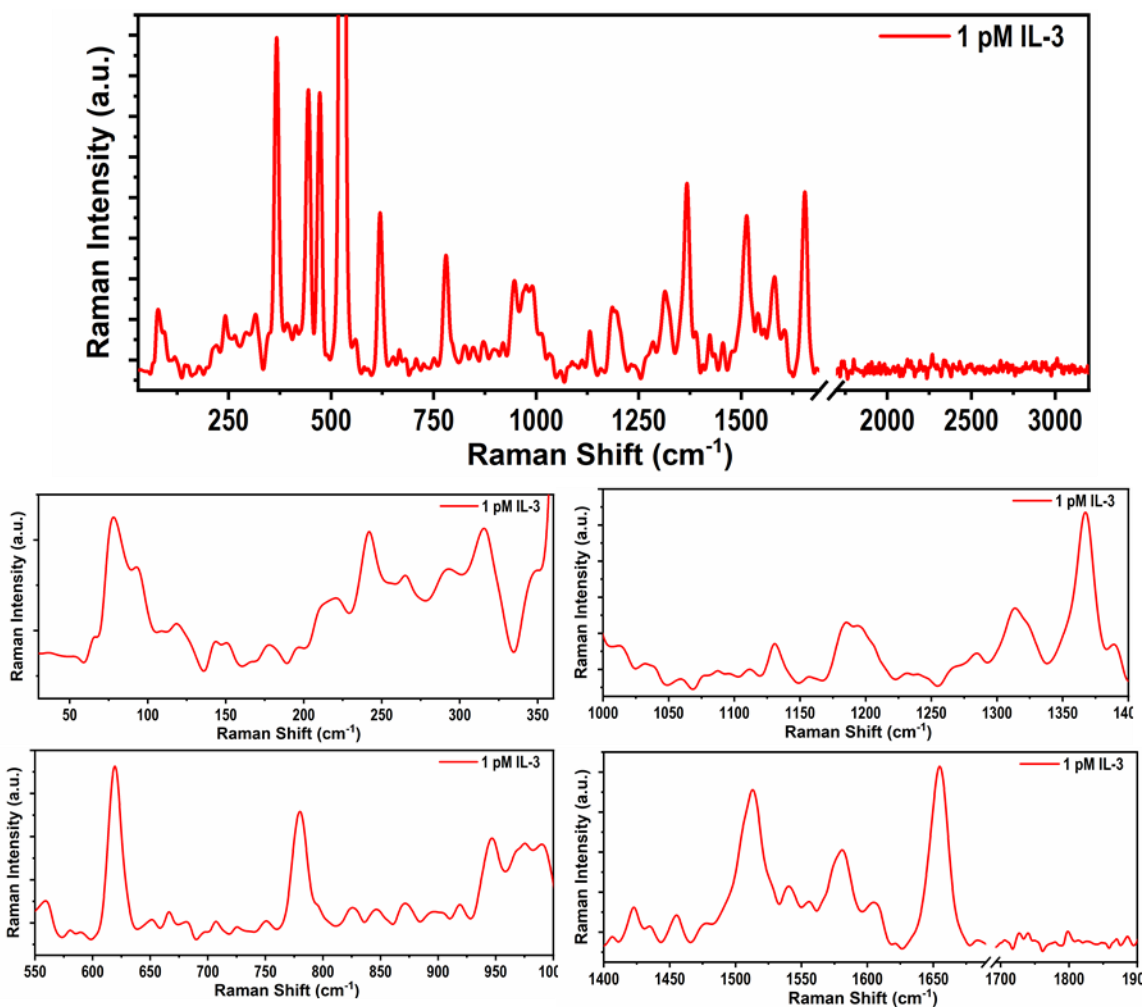

**Figure S9** | Raman spectra of IL-3 biomarker, where the range of Raman spectra is zoomed into four different regions as 50-360  $\text{cm}^{-1}$ , 550-1000  $\text{cm}^{-1}$ , 1000-1400  $\text{cm}^{-1}$  and 1400-1900  $\text{cm}^{-1}$ .

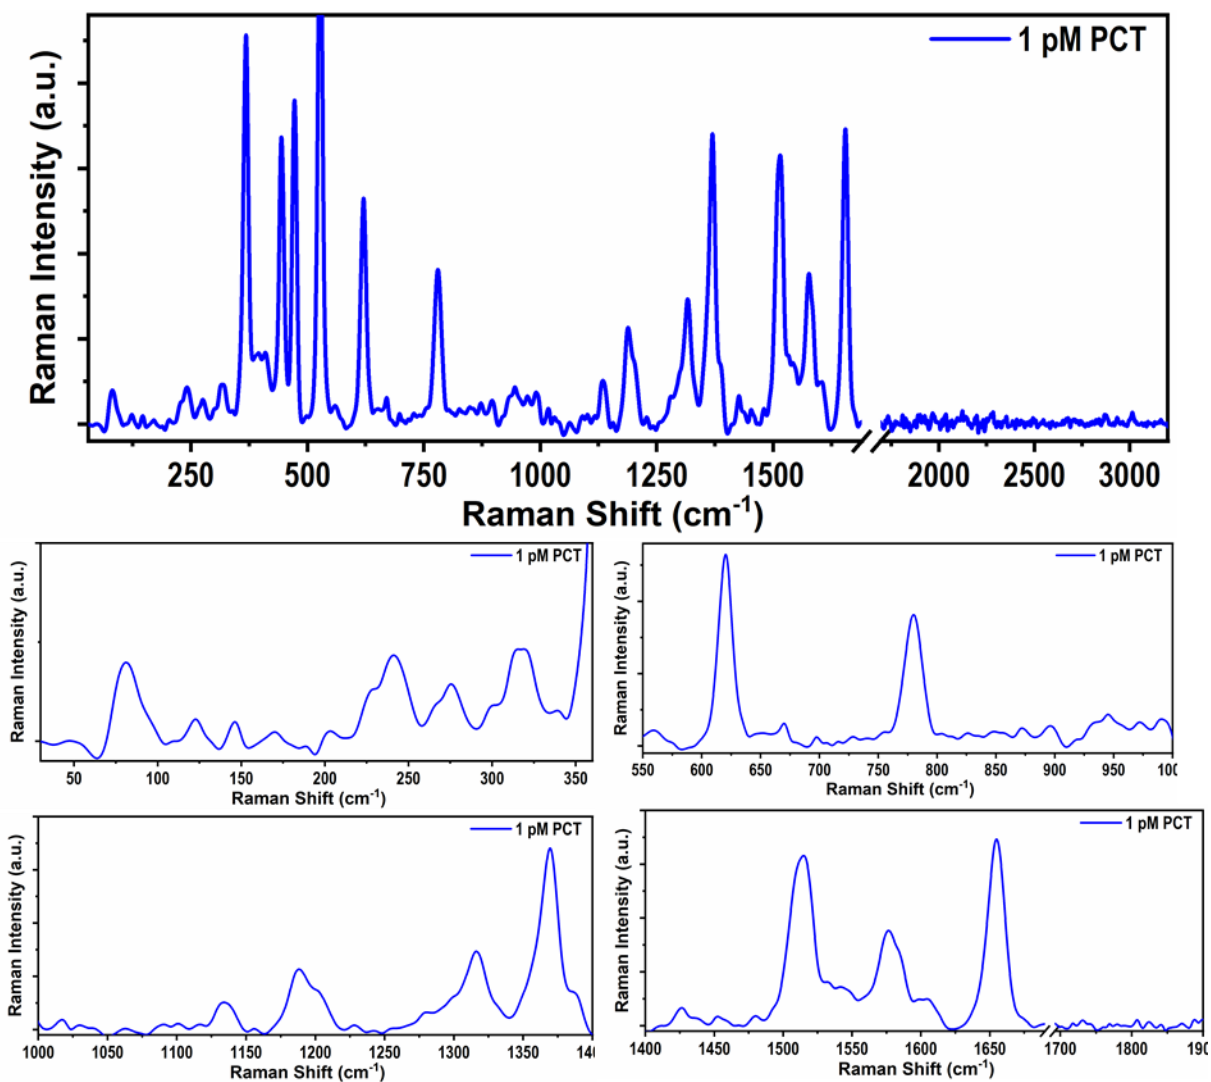

**Figure S10** Raman spectra of PCT biomarker, where the range of Raman spectra is zoomed into four different regions as 50-360  $\text{cm}^{-1}$ , 550-1000  $\text{cm}^{-1}$ , 1000-1400  $\text{cm}^{-1}$  and 1400-1900  $\text{cm}^{-1}$ .

## 12. Statistical Analysis of Raman intensity fluctuation

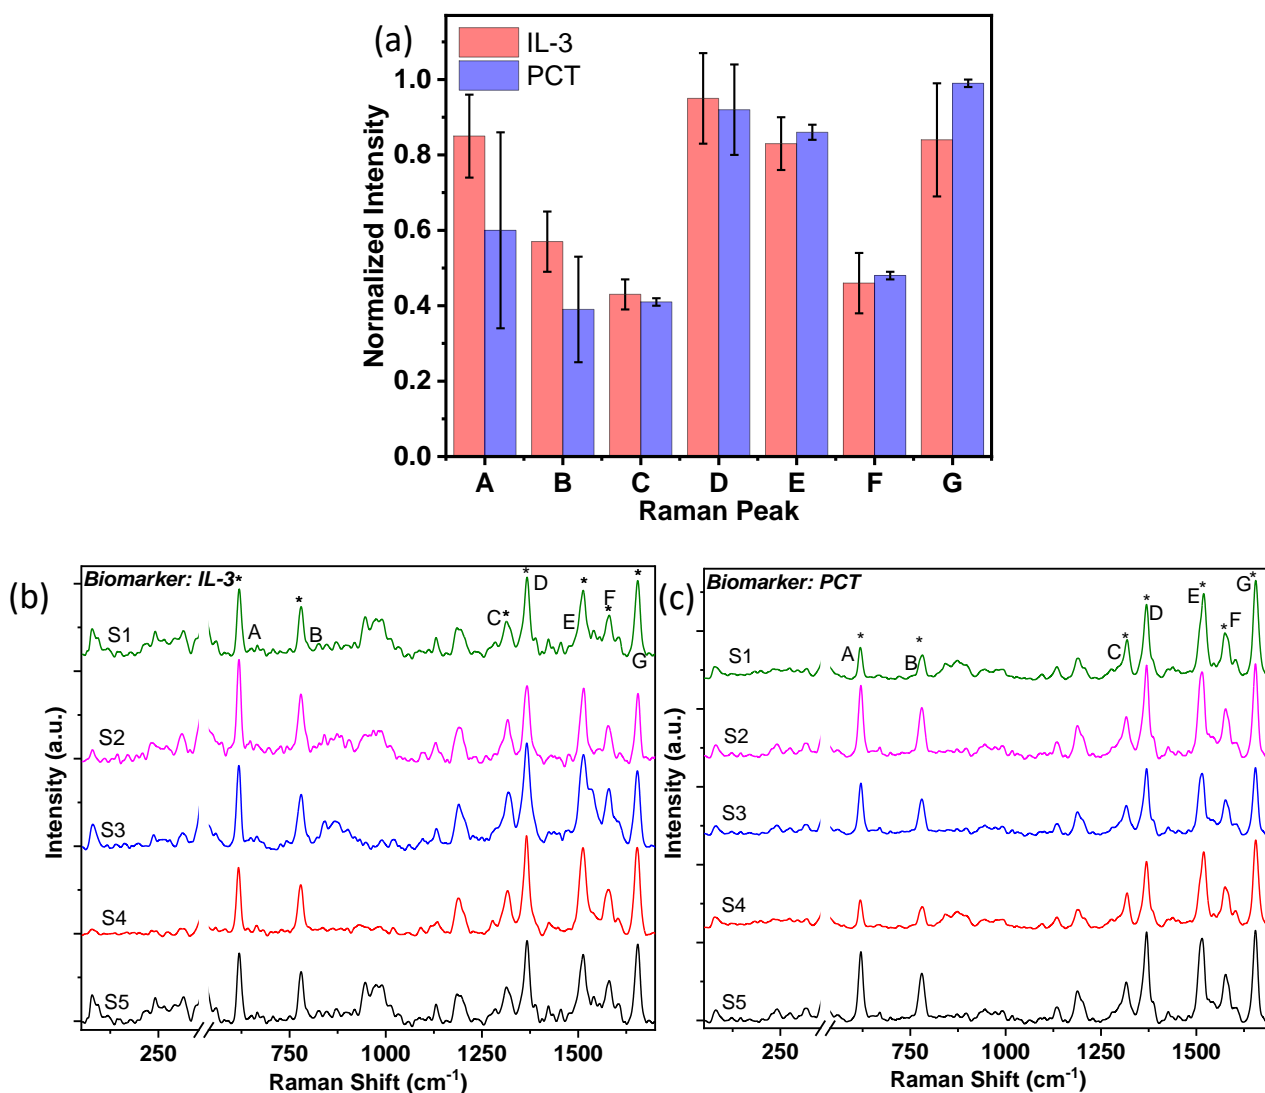

**Figure S11** (a) Fluctuation of Raman intensity for the different Raman peaks. The Raman spectra of the (b) IL-3 and (c) PCT biomarkers recorded from five different samples, where the mean Raman intensity fluctuation is found to be  $\sim 0.094$  and  $\sim 0.08$  for IL-3 and PCT, respectively.

In order to find the intensity fluctuation on the Raman peaks, we have normalized each spectrum with respect to the highest intense peak and calculated the standard deviation of the peak intensity for the six high intense peaks for both the biomarkers. The statistical analysis of the Raman spectra has been done based on the collected spectra from different samples, where each spectrum has been presented after averaging out multiple acquisitions of Raman spectra. For each concentration

of a particular biomarker, 5 samples were prepared and tested to check the reproducibility; likewise, 5 different concentrations are tested for a particular biomarker. Each presented spectrum in the manuscript is averaged from 10 separate spectra collected with acquisition time  $\sim 30$  sec each. Such averaging of the spectra is done to increase the signal to noise ratio of the spectra. Figure S11 depicts the Raman spectra in the revised SI for both the biomarkers (IL-3 & PCT) for five different samples of same concentration ( $\sim 1000$  pM) to show the intensity fluctuation in the Raman spectra. The as calculated standard deviation is demonstrated in the following Table ST2, where the mean standard deviation for IL-3 and PCT are found to be  $\sim 0.094$  (error  $\sim \pm 9.4\%$ ) and  $\sim 0.080$  (error  $\sim \pm 8\%$ ), respectively; which significantly low and indicates excellent reproducibility.

**Table ST2:** *Intensity fluctuation of Raman peaks of IL-3 and PCT*

| Peak Position                        | IL-3  | PCT   |
|--------------------------------------|-------|-------|
| A. 621.04                            | 0.111 | 0.268 |
| B. 782.35                            | 0.080 | 0.141 |
| C. 1319.56                           | 0.041 | 0.007 |
| D. 1369.34                           | 0.123 | 0.116 |
| E. 1520.92                           | 0.074 | 0.014 |
| F. 1573.51                           | 0.088 | 0.014 |
| G. 1653.75                           | 0.147 | 0.005 |
| Average Intensity Standard Deviation | 0.094 | 0.080 |

### 13. Raman spectra of Si BP, Si Buffer and Si AgNP@BP Buffer

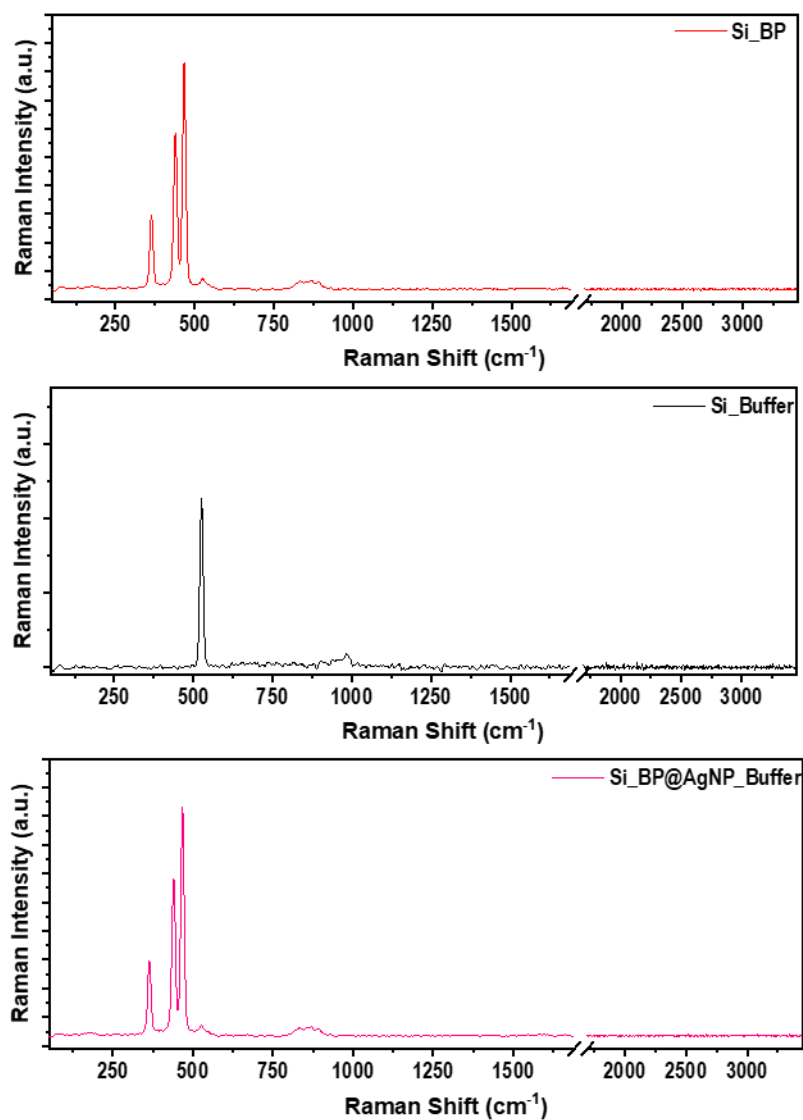

**Figure S12|** Raman spectra of the reference level from Si\_BP, Si\_Buffer and Si\_AgNP@BP\_Buffer.

**Table ST3:** *Raman peak position and corresponding band assignment of lipopolysaccharide (LPS).*<sup>3,4</sup>

| Raman Peak Position (cm <sup>-1</sup> ) | Band Assignment                              | Origin of Raman bands                                        |
|-----------------------------------------|----------------------------------------------|--------------------------------------------------------------|
| 620                                     | Bending of COO                               |                                                              |
| 777                                     | C-C stretching                               | Highly mixed in complex molecule ( Alicyclic molecules)      |
| 1131                                    | C-O-C group stretching<br>C-C stretching     | Presence of lipid<br>Due to polyethylene group               |
| 1194                                    | -                                            | Unidentified                                                 |
| 1316                                    | C-C bending                                  | Aliphatic molecules                                          |
| 1366                                    | CH <sub>3</sub> bending                      | Lipids                                                       |
| 1534                                    | C-C stretching                               | Aromatic ring vibration (mild)                               |
| 1579                                    | C-C stretching                               | Presence of Graphitic carbon                                 |
| 1655                                    | C=C stretching<br>C=N stretching ,           | Lipids<br>Lipids                                             |
| 2900                                    | C=O stretching<br>CH <sub>3</sub> stretching | Sugar<br>Presence of lipid<br>Presence of polyethylene group |

#### **14. Estimation of SERS EF of lipopolysaccharide (LPS):**

The SERS EF of LPS has been calculated from the two strongest Raman bands at 1366 and 1655  $\text{cm}^{-1}$  for three different concentrations of 1000 nM, 100 nM and 1 nM. Here, the SERS intensities and corresponding SERS enhancement factors are tabulated in Table ST3.

**Table ST4:** *SERS EF of lipopolysaccharide (LPS) for Raman peaks at 1366 and 1655 $\text{cm}^{-1}$  with the variation in LPS concentration.*

| <b>LPS</b>                      | <b>1366 <math>\text{cm}^{-1}</math></b> | <b>1655 <math>\text{cm}^{-1}</math></b> |
|---------------------------------|-----------------------------------------|-----------------------------------------|
|                                 | <b>SERS EF</b>                          |                                         |
| <b>1000 nM</b>                  | $5.47 \times 10^{14}$                   | $0.83 \times 10^{14}$                   |
| <b>100 nM</b>                   | $3.18 \times 10^{14}$                   | $3.2 \times 10^{14}$                    |
| <b>1 nM</b>                     | $1.56 \times 10^{14}$                   | $3.2 \times 10^{14}$                    |
| <b>Mean SERS EF</b>             | $2.9 \times 10^{14}$                    |                                         |
| <b>Limit of Detection (LOD)</b> | 1 nM                                    |                                         |

### 15. Estimation of SERS EF of interleukin-3 (IL-3):

The SERS EF of IL-3 has been calculated from the three strongest Raman bands at 620, 1366 and 1655  $\text{cm}^{-1}$  for four different concentrations of 1000 pM, 100 pM, 10 pM and 1 pM. Here, the SERS intensities and corresponding SERS enhancement factors are tabulated in Table ST4.

**Table ST5:** *SERS EF of interleukin-3 (IL-3) for Raman peaks at 620, 1366 and 1655 $\text{cm}^{-1}$  with the variation in IL-3 concentration.*

| IL-3                            | 620 $\text{cm}^{-1}$  | 1366 $\text{cm}^{-1}$ | 1655 $\text{cm}^{-1}$ |
|---------------------------------|-----------------------|-----------------------|-----------------------|
|                                 | <b>SERS EF</b>        |                       |                       |
| <b>1000 pM</b>                  | $2.9 \times 10^{14}$  | $3.37 \times 10^{13}$ | $3.91 \times 10^{14}$ |
| <b>100 pM</b>                   | $1.2 \times 10^{14}$  | $1.91 \times 10^{14}$ | $2.57 \times 10^{14}$ |
| <b>10 pM</b>                    | $1.49 \times 10^{14}$ | $2.66 \times 10^{14}$ | $3.86 \times 10^{14}$ |
| <b>1 pM</b>                     | $1.11 \times 10^{14}$ | $1.5 \times 10^{14}$  | $1.13 \times 10^{14}$ |
| <b>Mean SERS EF</b>             | $2.3 \times 10^{14}$  |                       |                       |
| <b>Limit of Detection (LOD)</b> | 1 pM                  |                       |                       |

## 16. Estimation of SERS EF of procalcitonin (PCT):

The SERS EF of PCT has been calculated from the three strongest Raman bands at 620, 1366 and 1655  $\text{cm}^{-1}$  for two different concentrations of 1000 fM and 100 fM. Here, the SERS intensities and corresponding SERS enhancement factors are tabulated in Table ST5.

**Table ST6:** *SERS EF of procalcitonin (PCT) for Raman peaks at 620, 1366 and 1655  $\text{cm}^{-1}$  with the variation in PCT concentration.*

| PCT                             | 620 $\text{cm}^{-1}$  | 1366 $\text{cm}^{-1}$ | 1655 $\text{cm}^{-1}$ |
|---------------------------------|-----------------------|-----------------------|-----------------------|
|                                 | <b>SERS EF</b>        |                       |                       |
| <b>1000 fM</b>                  | $6.49 \times 10^{14}$ | $8.0 \times 10^{14}$  | $9.4 \times 10^{14}$  |
| <b>100 fM</b>                   | $1.53 \times 10^{14}$ | $4.29 \times 10^{14}$ | $6.26 \times 10^{14}$ |
| <b>Mean SERS EF</b>             | $4.49 \times 10^{14}$ |                       |                       |
| <b>Limit of Detection (LOD)</b> | 100 fM                |                       |                       |

**Table ST7:** *Summary of the obtained SERS enhancement factor (EF) and limit of detection (LOD) values for different biomarkers.*

| Biomarkers                | LPS                  | IL-3                 | PCT                  |
|---------------------------|----------------------|----------------------|----------------------|
| <b>EF</b>                 | $2.9 \times 10^{14}$ | $2.3 \times 10^{14}$ | $4.5 \times 10^{14}$ |
| <b>Limit of Detection</b> | 1 nM                 | 1 pM                 | 100 fM               |

**Table ST8:** *Raman fingerprint modes of IL-3 and PCT.*

| <b>Biomarkers</b> | <b>Wavenumber (cm<sup>-1</sup>)</b>                                                          |
|-------------------|----------------------------------------------------------------------------------------------|
| IL-3              | 65, 92, 118, 177, 221, 265, 292, 347, 579, 681, 702, 919, 1111, 1285, 1406, 1739, 1752, 1798 |
| PCT               | 122, 170, 229, 203, 299, 740, 803, 1100, 1228, 1254, 1692, 1807, 1824, 1841, 1888            |

**Table ST9:** *Raman peak positions of IL-3 & PCT in clinical sample and confirmation with respect to the observed peak for pure biomarkers.*

| <b>Serum + IL-3</b> | <b>Observed for Pure IL-3</b> | <b>Serum + PCT</b> | <b>Observed for Pure PCT</b> |
|---------------------|-------------------------------|--------------------|------------------------------|
| 129.45              | YES                           | 116.01             | YES                          |
| 146.57              | YES                           | 139.51             | YES                          |
| 409.52              | YES                           | 171.93             | YES                          |
| 801.95              | YES                           | 196.38             | YES                          |
| 834.32              | YES                           | 219.77             | YES                          |
| 869.78              | YES                           | 244.86             | YES                          |
| 892.89              | YES                           | 974.1              | YES                          |
| 1178.35             | YES                           | 1044.02            | YES                          |
| 1298.17             | YES                           | 1084.62            | YES                          |
| 1364.3              | YES                           | 1128.32            | YES                          |
| 1372.58             | YES                           | 1280.5             | YES                          |
| 1421.57             | YES                           | 1316.83            | YES                          |
| 1518.44             | YES                           | 1361.54            | YES                          |
| 1552.5              | YES                           | 1373.38            | YES                          |

|         |     |         |     |
|---------|-----|---------|-----|
| 1569.84 | YES | 1437.69 | YES |
| 1648.54 | YES | 1516.61 | YES |
|         |     | 1547.14 | YES |
|         |     | 1572.83 | YES |
|         |     | 1607.63 | YES |
|         |     | 1655.59 | YES |

**Table ST10:** Raman peak positions, band assignment, and origin of Raman modes for human serum and mixed (IL-3 + PCT) clinical sample.<sup>5-10</sup>

| Human Serum | Origin                                                                                   | Serum + IL-3 + PCT | Origin      |
|-------------|------------------------------------------------------------------------------------------|--------------------|-------------|
| 856.21      | Proline, hydroxyproline, and tyrosine C-C stretching                                     | 114.56             | IL-3        |
| 893.02      | Tryptophan, $\delta$ (ring)                                                              | 122.31             | PCT         |
| 934.48      | C-C stretch of proline ring/glucose/lactic acid; C-C, praline ring (collagen assignment) | 135.76             | IL-3        |
| 943.17      |                                                                                          | 146.36             | IL-3, PCT   |
| 956.22      | Hydroxyapatite, carotenoid, and cholesterol                                              | 194.28             | IL-3        |
| 1132.89     | the strong C-O band of ribose                                                            | 221.16             | IL-3        |
| 1175.58     | (CH) phenylalanine, tyrosine                                                             | 228.07             | PCT         |
| 1215.08     | C-C6H5 stretching mode in tyrosine and phenylalanine                                     | 268.21             | IL-3        |
| 1255.44     | Lipids                                                                                   | 412.48             | IL-3        |
| 1265.73     | Symmetric Ring deformation; tyrosine                                                     | 437.43             | IL-3, PCT   |
| 1276.9      | Typical phospholipids, C=C groups in fatty acids, amide III band in proteins             | 464.95             | IL-3, PCT   |
| 1314.46     | G ring breathing modes of the DNA/RNA                                                    | 472.04             | IL-3, PCT   |
| 1335.47     | Polynucleotide chain (DNA purine bases)                                                  | 614.48             |             |
| 1345.73     | C-H bending; Tryptophane                                                                 | 617.53             | IL-3, PCT   |
| 1376.64     | $\delta$ CH3 symmetric (lipid assignment)                                                | 632.82             | IL-3        |
| 1408.34     | CH2, CH3 bending; phosphatase                                                            | 668.58             | IL-3, PCT   |
| 1423.81     | G, A (DNA, RNA)                                                                          | 714.64             | IL-3        |
| 1446.8      | CH2 bending mode of proteins and lipids                                                  | 811.17             | PCT         |
| 1458.82     | $\delta$ CH2, disaccharides                                                              | 833.92             | IL-3        |
| 1480.42     | Guanine (N7)                                                                             | 861.89             | Serum, IL-3 |

|         |                                                        |         |                  |
|---------|--------------------------------------------------------|---------|------------------|
| 1531.75 | Amide carbonyl group vibrations and aromatic hydrogens | 883.17  | IL-3             |
| 1558.53 | Tryptophan                                             | 914.47  | IL-3             |
| 1583.62 | $\delta$ (C-C), phenylalanine                          | 987.3   | IL-3, PCT        |
| 1643.91 | Amide I band (protein band)                            | 1077.5  | PCT              |
| 1681.67 | Amide I                                                | 1128.2  | IL-3             |
| 2907.08 | CH asymmetric Stretching; Dimethylthio-acetamide       | 1175.77 | Serum            |
| 2915.17 | CH band of lipids and proteins                         | 1194.2  | IL-3             |
| 2968.12 | CH <sub>2</sub> asymmetric Vibration; L-asparagine     | 1239.24 | PCT              |
|         |                                                        | 1253.19 | Serum            |
|         |                                                        | 1259.17 | PCT              |
|         |                                                        | 1293.62 | IL-3             |
|         |                                                        | 1334.09 | Serum            |
|         |                                                        | 1350.36 | Serum            |
|         |                                                        | 1360.36 | IL-3             |
|         |                                                        | 1375.45 | Serum, IL-3, PCT |
|         |                                                        | 1409.94 | IL-3             |
|         |                                                        | 1420.98 | IL-3, PCT        |
|         |                                                        | 1435.48 | IL-3, PCT        |
|         |                                                        | 1441.96 | Serum            |
|         |                                                        | 1479.64 | Serum, IL-3      |
|         |                                                        | 1513.68 | IL-3, PCT        |
|         |                                                        | 1534.18 | Serum            |
|         |                                                        | 1554.96 | IL-3, PCT        |
|         |                                                        | 1574.06 | IL-3, PCT        |
|         |                                                        | 1583.5  | Serum            |
|         |                                                        | 1648.35 | Serum            |
|         |                                                        | 1659.68 | IL-3, PCT        |
|         |                                                        | 1680.51 | Serum            |
|         |                                                        | 1688.5  | PCT              |
|         |                                                        | 1743.02 | IL-3             |

## References:

- (1) Lin, D., Wu, Z., Li, S., Zhao, W., Ma, C., Wang, J., ... & Yang, X. **2017**. *ACS nano*, 11(2), 1478-1487.
- (2) Erridge, C., Bennett-Guerrero, E. & Poxton, I. R. Structure and function of lipopolysaccharides. *Microbes Infect.* 4, 837–51 (2002).
- (3) Trueblood, J. V., Estillore, A. D., Lee, C., Dowling, J. A., Prather, K. A., & Grassian, V. H. *The Journal of Physical Chemistry A*, 120(32), 6444-6450 (2016).
- (4) Cochran, R. E., Laskina, O., Trueblood, J. V., Estillore, A. D., Morris, H. S., Jayarathne, T., ... & Laskin, A. *Chem*, 2(5), 655-667 (2017).
- (5) Kotanen, C. N.; Martinez, L.; Alvarez, R.; Simecek, J. W. *Bio-Sensing Res.* **2016**, 8, 20–26.
- (6) Ma, H.; Sun, X.; Chen, L.; Han, X. X.; Zhao, B.; Lu, H.; He, C. *Anal. Chem.* **2018**, 90 (21), 12342–12346.
- (7) Sahu, A.; Sawant, S.; Talathi-Desai, S.; Murali Krishna, C. *Biomed. Spectrosc. Imaging* **2015**, 4 (2), 171–187.
- (8) Atkins, C. G.; Buckley, K.; Blades, M. W.; Turner, R. F. B. *Appl. Spectrosc.* **2017**, 71 (5), 767–793.
- (9) Zou, Y.; Xia, P.; Yang, F.; Cao, F.; Ma, K.; Mi, Z.; Huang, X.; Cai, N.; Jiang, B.; Zhao, X.; et al. *Anal. Methods* **2016**, 8 (18), 3763–3767.
- (10) Fenn, M. B.; Xanthopoulos, P.; Pyrgiotakis, G.; Grobmyer, S. R.; Pardalos, P. M.; Hench, L. L. *Adv. Opt. Technol.* **2011**, 2011.
- (11) Kundu, A.; Rani, R.; Hazra, S. K. *Nanoscale*, **2019**, 11, 16245-16252
